# Supplementary material
Source: MDPI journal article supplement (https://www.mdpi.com/2073-4441/13/13/1828)
Supplement: s1 [file s1]

# Assessing the Extinction Risk of *Heterocypris incongruens* (Crustacea: Ostracoda) in Climate Change with Sensitivity and Uncertainty Analysis

Nicolò Bellin, Rachele Spezzano and Valeria Rossi \*

Department of Chemistry, Life Sciences and Environmental Sustainability, University of Parma, Viale delle Scienze 11/A, I-43124 Parma (Italy); nicolo.bellin@unipr.it (N.B.); rachele.spezzano@studenti.unipr.it (R.S.);

\* Correspondence: valeria.rossi@unipr.it (V.R.); Tel.: +39 0521 905612

**Table S1.** The life table reported the production of resting eggs obtained by two microcosmos experiments (Rossi et al., 1996; Rossi et al., 2016) for each *H. incongruens* clonal lineages and the number of females (N) that produced resting eggs during the experiments. The microcosmos experiments were carried out under three different environmental conditions: Winter (12° C and 8 light hours / 16 dark hours), Spring/Autumn (24° C and 12 light hours / 12 dark) and Summer (28 °C and 16 light hours / 8 dark hours).

| Clonal lineages. | Environmental Conditions |    |               |    |              |    |
|------------------|--------------------------|----|---------------|----|--------------|----|
|                  | Winter                   |    | Spring/Autumn |    | Summer       |    |
|                  | Resting eggs             | N  | Resting eggs  | N  | Resting eggs | N  |
| W1               | 186                      | 1  | 290           | 12 | 590          | 10 |
| W2               | 0                        | 0  | 457           | 11 | 146          | 12 |
| S1               | 0                        | 0  | 27            | 12 | 69           | 12 |
| S2               | 0                        | 0  | 445           | 6  | 112          | 9  |
| I1               | 73                       | 2  | 2             | 11 | 3            | 12 |
| I2               | 82                       | 3  | 19            | 10 | 3            | 3  |
| L                | 67                       | 22 | 385           | 21 | -            | -  |

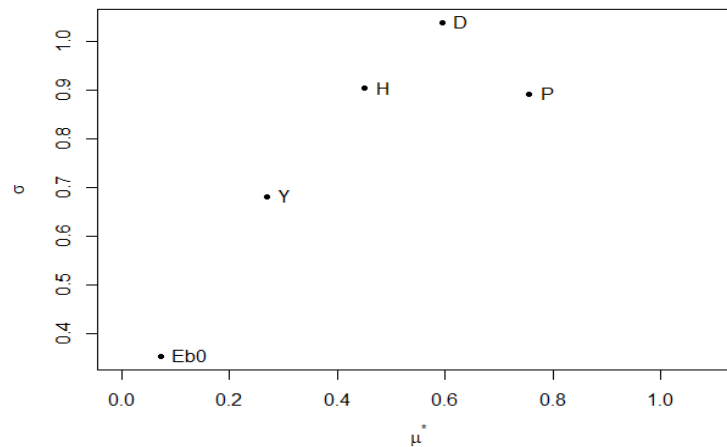

**Figure S1.** Morris screening on exponential growth model: Eb<sub>0</sub> is the number of resting eggs at time 0, H is the hatching rate, Y is the mean number of resting eggs produced per female, P is the probability that the water balance is positive and D is the deterioration rate. The x-axis represent the mean absolute value for elementary effect ( $\mu^*$ ), a measure of the importance on dispersion in model output, and the y- axis represent the standard deviation of the elementary effects ( $\sigma$ ), a measure of the degree of the interaction effects between factors.

**Table S2.** For each factor of Cohen equation (Equation (1)) and clonal lineages, distribution and relative parameters were reported for two different climatic conditions: present and climate change. Factors H, D were assumed to be random factors that vary between 0 and 1 in each climatic condition. P and Y distributions were estimated by data (Rossi et al., 1993; Rossi et al., 2016).

| Factor | Description                                     | Measure unit                          | Distribution |         |                                   |                                           |
|--------|-------------------------------------------------|---------------------------------------|--------------|---------|-----------------------------------|-------------------------------------------|
|        |                                                 |                                       | Clone        | Present | Climate change                    |                                           |
| H      | Hatching rate                                   | n° of eggs that hatch / total n° eggs | W1           | uniform | min=0<br>max =1                   | uniform<br>min=0<br>max =1                |
|        |                                                 |                                       | W2           | uniform | min=0<br>max =1                   | uniform<br>min=0<br>max =1                |
|        |                                                 |                                       | S2           | uniform | min=0<br>max =1                   | uniform<br>min=0<br>max =1                |
|        |                                                 |                                       | L            | uniform | min=0<br>max =1                   | uniform<br>min=0<br>max =1                |
|        |                                                 |                                       | S1           | uniform | min=0<br>max =1                   | uniform<br>min=0<br>max =1                |
|        |                                                 |                                       | I2           | uniform | min=0<br>max =1                   | uniform<br>min=0<br>max =1                |
|        |                                                 |                                       | I1           | uniform | min=0<br>max =1                   | uniform<br>min=0<br>max =1                |
| P      | Probability that the water balance is positive  | dimensionless                         | W1           | beta    | $\alpha = 0.82$<br>$\beta = 0.47$ | beta<br>$\alpha = 0.19$<br>$\beta = 0.29$ |
|        |                                                 |                                       | W2           | beta    | $\alpha = 0.82$<br>$\beta = 0.47$ | beta<br>$\alpha = 0.19$<br>$\beta = 0.29$ |
|        |                                                 |                                       | S2           | beta    | $\alpha = 0.82$<br>$\beta = 0.47$ | beta<br>$\alpha = 0.19$<br>$\beta = 0.29$ |
|        |                                                 |                                       | L            | beta    | $\alpha = 0.82$<br>$\beta = 0.47$ | beta<br>$\alpha = 0.19$<br>$\beta = 0.29$ |
|        |                                                 |                                       | S1           | beta    | $\alpha = 0.82$<br>$\beta = 0.47$ | beta<br>$\alpha = 0.19$<br>$\beta = 0.29$ |
|        |                                                 |                                       | I2           | beta    | $\alpha = 0.82$<br>$\beta = 0.47$ | beta<br>$\alpha = 0.19$<br>$\beta = 0.29$ |
|        |                                                 |                                       | I1           | beta    | $\alpha = 0.82$<br>$\beta = 0.47$ | beta<br>$\alpha = 0.19$<br>$\beta = 0.29$ |
| Y      | Mean number of resting eggs produced per female | n° of eggs produced / female          | W1           | poisson | mean=46.30                        | poisson mean=46.30                        |
|        |                                                 |                                       | W2           | poisson | mean=25.1                         | poisson mean=25.1                         |
|        |                                                 |                                       | S2           | poisson | mean=24                           | poisson mean= 24                          |
|        |                                                 |                                       | L            | poisson | mean= 10.5                        | poisson mean=10.5                         |
|        |                                                 |                                       | S1           | poisson | mean=4.00                         | poisson mean=4. 00                        |
|        |                                                 |                                       | I2           | poisson | mean=3.81                         | poisson mean=3.81                         |
|        |                                                 |                                       | I1           | poisson | mean=1.04                         | poisson mean= 1.04                        |
| D      | Egg deterioration rate                          | n °of decayed eggs / total n° eggs    | W1           | uniform | min=0<br>max =1                   | uniform<br>min=0<br>max =1                |
|        |                                                 |                                       | W2           | uniform | min=0<br>max =1                   | uniform<br>min=0<br>max =1                |
|        |                                                 |                                       | S2           | uniform | min=0<br>max =1                   | uniform<br>min=0<br>max =1                |
|        |                                                 |                                       | L            | uniform | min=0<br>max =1                   | uniform<br>min=0<br>max =1                |
|        |                                                 |                                       | S1           | uniform | min=0<br>max =1                   | uniform<br>min=0<br>max =1                |
|        |                                                 |                                       | I2           | uniform | min=0<br>max =1                   | uniform<br>min=0<br>max =1                |
|        |                                                 |                                       | I1           | uniform | min=0<br>max =1                   | uniform<br>min=0<br>max =1                |

**R script 1SM.** LHS sampling method and extinction rate estimation . We sampling 1000 combinations of factors and we run the simulation for 30 time steps.

```
library(pse)
factors <- c("H", "P", "Y", "D")
q.distribution <- c("qunif", "qbeta", "qpois", "qunif")
q.sensi <- list(list( min= 0, max=1), list(shape1 = #climatic condition, shape2 = #climatic
condition),
               list(lambda = #clone's value), list( min=0, max=1))

time <- 30
clone <- function(H,P,Y,D) {
  X <- array()
  extinction <- array()
  X[1] <- 10
  for( i in 1:time){
    l <- ( (1-P) × log((1-H)×(1-D)) ) + P × (log((1-H)×(1-D) + H×Y))
    Xl <- X[length(X)]
    X[i]<- Xl + l × Xl
  }
  ifelse(X[30] < 1 , extinction[30] <- 1 , extinction[30] <- 0)
  return(extinction[30])
}
Run.clone <- function (my.data) {
  return(mapply(clone, my.data[,1], my.data[,2],my.data[,3],my.data[,4]))
}

myLHS <- LHS(Run.clone, factors, 1000, q.distribution, q.sensi, nboot=1000)
result.clone <- get.results(myLHS)
extinction.rate <- length(which(result.clone == 1)) / 1000
```

**Table S3.** Correlation coefficients and p values estimated from the correlation analysis. The factor's values were relative to the model output extinction of the egg bank.

|     |                | Factor | H | P        | Y        | D      |
|-----|----------------|--------|---|----------|----------|--------|
| W1. | Present        | rho    | H | 1        | -        | -      |
|     |                |        | P | 0.24     | 1        | -      |
|     |                |        | Y | -0.001   | -0.070   | 1      |
|     |                |        | D | -0.18    | 0.41     | -0.020 |
|     |                |        | D | -0.18    | 0.41     | -0.020 |
|     | p value        |        | H | 0        | -        | -      |
|     |                |        | P | < 0.001  | 0        | -      |
|     |                |        | Y | 0.97     | 0.11     | 0      |
|     |                |        | D | < 0.0001 | < 0.0001 | 0.62   |
|     |                |        | D | < 0.0001 | < 0.0001 | 0.62   |
|     | Climate change | rho    | H | 1        | -        | -      |
|     |                |        | P | 0.24     | 1        | -      |
|     |                |        | Y | -0.043   | -0.005   | 1      |
|     |                |        | D | -0.18    | 0.43     | 0.099  |
|     |                |        | D | -0.18    | 0.43     | 0.099  |
|     | p value        |        | H | 0        | -        | -      |
|     |                |        | P | < 0.0001 | 0        | -      |
|     |                |        | Y | 0.42     | 0.92     | 0      |
|     |                |        | D | < 0.0001 | < 0.0001 | 0.06   |
|     |                |        | D | < 0.0001 | < 0.0001 | 0.06   |
| W2  | Present        | rho    | H | 1        | -        | -      |
|     |                |        | P | 0.14     | 1        | -      |
|     |                |        | Y | 0.027    | -0.042   | 1      |
|     |                |        | D | -0.18    | 0.44     | 0.019  |
|     |                |        | D | -0.18    | 0.44     | 0.019  |
|     | p value        |        | H | 0        | -        | -      |
|     |                |        | P | 0.002    | 0        | -      |
|     |                |        | Y | 0.57     | 0.37     | 0      |
|     |                |        | D | < 0.0001 | < 0.0001 | 0.68   |
|     |                |        | D | < 0.0001 | < 0.0001 | 0.68   |
|     | Climate change | rho    | H | 1        | -        | -      |
|     |                |        | P | 0.086    | 1        | -      |
|     |                |        | Y | 0.056    | 0.032    | 1      |
|     |                |        | D | -0.21    | 0.38     | 0.96   |
|     |                |        | D | -0.21    | 0.38     | 0.96   |
|     | P value        |        | H | 0        | -        | -      |
|     |                |        | P | 0.08     | 0        | -      |
|     |                |        | Y | 0.26     | 0.52     | 0      |
|     |                |        | D | < 0.0001 | < 0.0001 | 0.96   |
|     |                |        | D | < 0.0001 | < 0.0001 | 0.96   |
| S2  | Present        | rho    | H | 1        | -        | -      |
|     |                |        | P | 0.220    | 1        | -      |
|     |                |        | Y | 0.011    | -0.0622  | 1      |
|     |                |        | D | -0.097   | 0.494    | -0.058 |
|     |                |        | D | -0.097   | 0.494    | -0.058 |
|     | p value        |        | H | 0        | -        | -      |
|     |                |        | P | < 0.0001 | 0        | -      |
|     |                |        | Y | 0.80     | 0.19     | 0      |
|     |                |        | D | 0.04     | < 0.0001 | 0.22   |
|     |                |        | D | 0.04     | < 0.0001 | 0.22   |
|     | Climate change | rho    | H | 1        | -        | -      |
|     |                |        | P | 0.11     | 1        | -      |
|     |                |        | P | 0.11     | 1        | -      |

|    |                |         |        |         |         |          |   |
|----|----------------|---------|--------|---------|---------|----------|---|
| L  | Present        | p value | Y      | 0.055   | -0.08   | 1        | - |
|    |                |         | D      | -0.14   | 0.37    | -0.0064  | 1 |
|    |                |         | Factor | H       | P       | Y        | D |
|    |                |         | H      | 0       | -       | -        | - |
|    |                |         | P      | 0.023   | 0       | -        | - |
|    |                |         | Y      | 0.27    | 0.10    | 0        | - |
|    |                |         | D      | 0.0048  | <0.0001 | 0.89     | 0 |
|    |                |         | Factor | H       | P       | Y        | D |
|    |                | Rho     | H      | 1       | -       | -        | - |
|    |                |         | P      | 0.03    | 1       | -        | - |
|    |                |         | Y      | 0.04    | -0.06   | 1        | - |
|    |                |         | D      | -0.16   | 0.48    | -0.01    | 1 |
|    |                |         | Factor | H       | P       | Y        | D |
|    |                | p value | H      | 0       | -       | -        | - |
|    |                |         | P      | 0.49    | 0       | -        | - |
|    |                |         | Y      | 0.32    | 0.18    | 0        | - |
|    |                |         | D      | <0.003  | <0.0001 | 0.72     | 0 |
|    |                |         | Factor | H       | P       | Y        | D |
| S1 | Climate change | Rho     | H      | 1       | -       | -        | - |
|    |                |         | P      | -0.10   | 1       | -        | - |
|    |                |         | Y      | -0.02   | -0.17   | 1        | - |
|    |                |         | D      | -0.19   | 0.48    | -0.007   | 1 |
|    |                |         | Factor | H       | P       | Y        | D |
|    |                | p value | H      | 0       | -       | -        | - |
|    |                |         | P      | 0.03    | 0       | -        | - |
|    |                |         | Y      | 0.63    | <0.0001 | 0        | - |
|    |                |         | D      | <0.0001 | <0.0001 | 0.88     | 0 |
|    |                |         | Factor | H       | P       | Y        | D |
|    | Present        | Rho     | H      | 1       | -       | -        | - |
|    |                |         | P      | 0.0135  | 1       | -        | - |
|    |                |         | Y      | 0.038   | -0.156  | 1        | - |
|    |                |         | D      | -0.095  | 0.344   | 0.064    | 1 |
|    |                |         | Factor | H       | P       | Y        | D |
|    |                | p value | H      | 0       | -       | -        | - |
|    |                |         | P      | 0.739   | 0       | -        | - |
|    |                |         | Y      | 0.347   | <0.0001 | 0        | - |
|    |                |         | D      | 0.019   | <0.0001 | 0.11     | 0 |
|    |                |         | Factor | H       | P       | Y        | D |
| I2 | Climate change | Rho     | H      | 1       | -       | -        | - |
|    |                |         | P      | -0.073  | 1       | -        | - |
|    |                |         | Y      | -0.04   | -0.20   | 1        | - |
|    |                |         | D      | -0.12   | 0.39    | -0.00024 | 1 |
|    |                |         | Factor | H       | P       | Y        | D |
|    |                | p value | H      | 0       | -       | -        | - |
|    |                |         | P      | 0.86    | 0       | -        | - |
|    |                |         | Y      | 0.27    | <0.0001 | 0        | - |
|    |                |         | D      | 0.006   | <0.0001 | 0.99     | 0 |
|    |                |         | Factor | H       | P       | Y        | D |
|    | Present        | rho     | H      | 1       | -       | -        | - |
|    |                |         | P      | 0.09    | 1       | -        | - |
|    |                |         | Y      | -0.037  | -0.17   | 1        | - |
|    |                |         | D      | -0.13   | 0.36    | 0.10     | 1 |
|    |                |         | Factor | H       | P       | Y        | D |
|    |                | p value | H      | 0       | -       | -        | - |
|    |                |         | P      | 0.024   | 0       | -        | - |
|    |                |         | Y      | 0.35    | <0.0001 | 0        | - |

|   |                |         |        |        |         |         |   |
|---|----------------|---------|--------|--------|---------|---------|---|
| 1 | Climate change | rho     | D      | 0.0006 | <0.0001 | 0.011   | 0 |
|   |                |         | Factor | H      | P       | Y       | D |
|   |                |         | H      | 1      | -       | -       | - |
|   |                |         | P      | -0.031 | 1       | -       | - |
|   |                |         | Y      | -0.026 | -0.20   | 1       | - |
|   |                | p value | D      | -0.10  | 0.37    | 0.01    | 1 |
|   |                |         | Factor | H      | P       | Y       | D |
|   |                |         | H      | 0      | -       | -       | - |
|   |                |         | P      | 0.47   | 0       | -       | - |
|   |                |         | Y      | 0.54   | <0.0001 | 0       | - |
|   | Present        | Rho     | D      | 0.01   | <0.0001 | 0.67    | 0 |
|   |                |         | Factor | H      | P       | Y       | D |
|   |                |         | H      | 1      | -       | -       | - |
|   |                |         | P      | 0.08   | 1       | -       | - |
|   |                |         | Y      | 0.07   | -0.012  | 1       | - |
|   |                | p value | D      | -0.10  | 0.18    | 0.13    | 1 |
|   |                |         | Factor | H      | P       | Y       | D |
|   |                |         | H      | 0      | -       | -       | - |
|   |                |         | P      | 0.036  | 0       | -       | - |
|   |                |         | Y      | 0.05   | 0.74    | 0       | - |
|   | Climate change | Rho     | D      | 0.0064 | <0.0001 | 0.00045 | 0 |
|   |                |         | Factor | H      | P       | Y       | D |
|   |                |         | H      | 1      | -       | -       | - |
|   |                |         | P      | 0.08   | 1       | -       | - |
|   |                |         | Y      | 0.06   | -0.11   | 1       | - |
|   |                | p value | D      | -.12   | 0.21    | 0.12    | 1 |
|   |                |         | Factor | H      | P       | Y       | D |
|   |                |         | H      | 0      | -       | -       | - |
|   |                |         | P      | 0.033  | 0       | -       | - |
|   |                |         | Y      | 0.10   | 0.003   | 0       | - |
|   |                |         | D      | 0.001  | <0.0001 | 0.0014  | 0 |

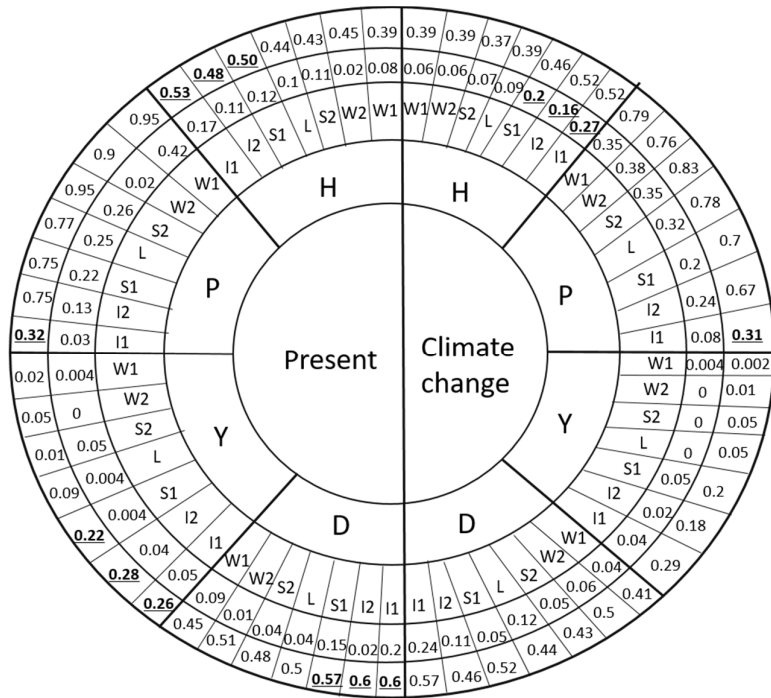

**Figure S2.** Hierarchical doughnut chart reported from the center to the border: the two climatic conditions: present and climate change; the factors: hatching rate (H), probability that the water balance is positive (P), the mean number of resting eggs produced per female (Y), and the deterioration rate (D); the clonal lineages: W1, W2, S2, Ls, I2, S1, and I1; the Sobol first index; and the Sobol total index. Sobol's indices that differ in importance among clones were reported in the manuscript and they were represented underlined and in bold.
